# Supplementary material for: The Role of p53 Signaling in Colorectal Cancer
Source: MDPI journal article supplement (doi:10.3390/cancers13092125), 2021-04-28
Supplement: s1 [file s1]

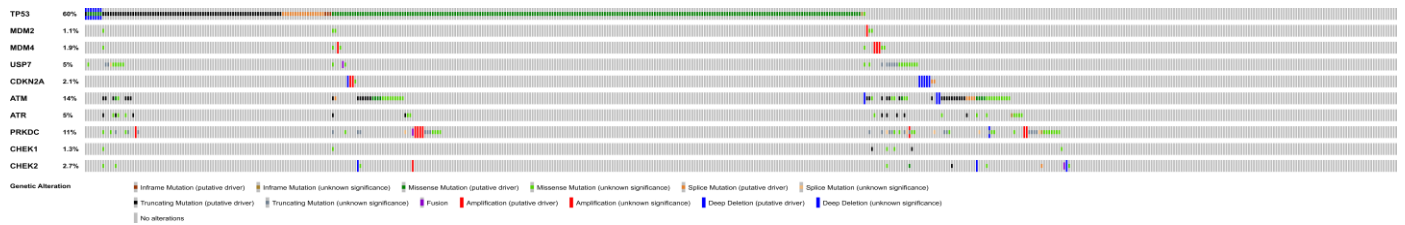

**Figure S1: Prevalence of genetic alterations in p53 and upstream p53 regulators in COAD.** The Oncoprint displays the genomic alterations (legend) in p53 and upstream p53 regulators (rows) across 526 COAD samples (columns; TCGA, PanCancer COAD dataset). The data was accessed via the cBioPortal webservice (<https://www.cbioportal.org/>) [180,181].
